# Supplementary material
Source: publisher figshare collection journal article supplement (https://acs.figshare.com/ndownloader/files/3826207)
Supplement: Supplementary file 1 [file 3826207]

Supplementary data for

**Co-delivery of Sorafenib and Curcumin by Directed Self-assembled Nanoparticles Enhances Therapeutic Effect on Hepatocellular Carcinoma**

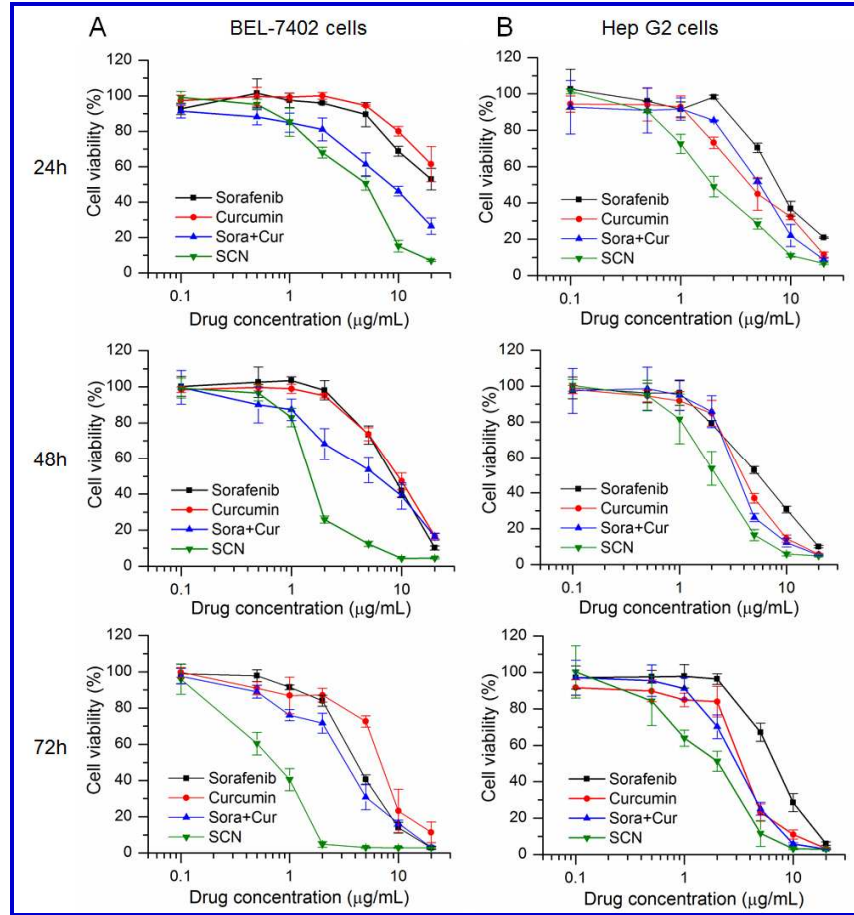

**Figure S1** In vitro cytotoxicity of sorafenib, curcumin, physical mixture of sorafenib+curcumin (Sora+Cur) and SCN in human HCC cells. (A) BEL-7402 cells; (B) Hep G2 cells. The drug concentrations in sorafenib, curcumin and Sora+Cur groups were equivalent to that in SCN.
